# Supplementary material for: Phenotypic Heterogeneity Analysis of APC-Mutant Colon Cancer by Proteomics and Phosphoproteomics Identifies RAI14 as a Key Prognostic Determinant in East Asians and Westerners
Source: PubMed Central journal article supplement (PMC10148045; doi:10.1016/j.mcpro.2023.100532), 2023-03-18

supplemental Fig. S1

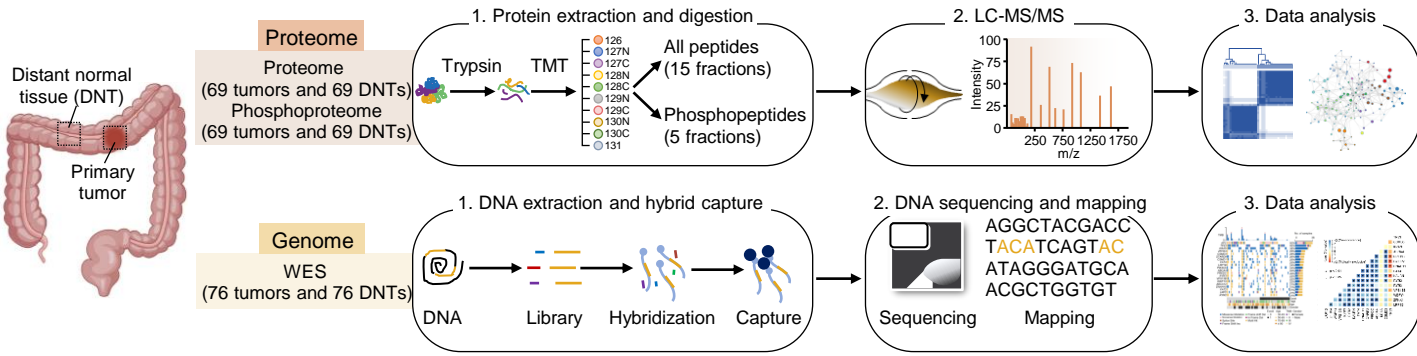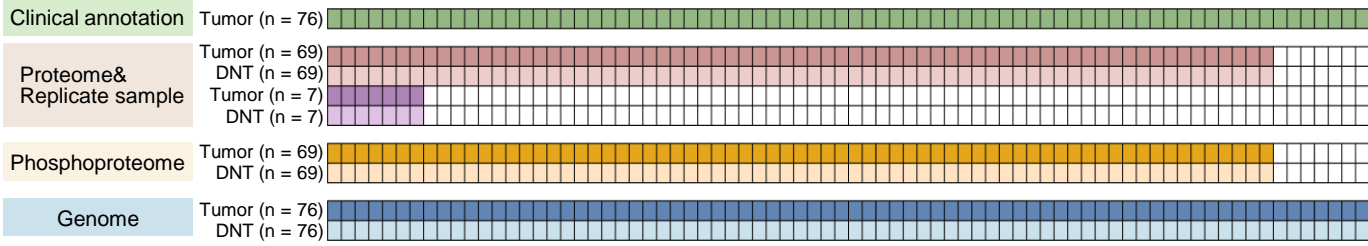

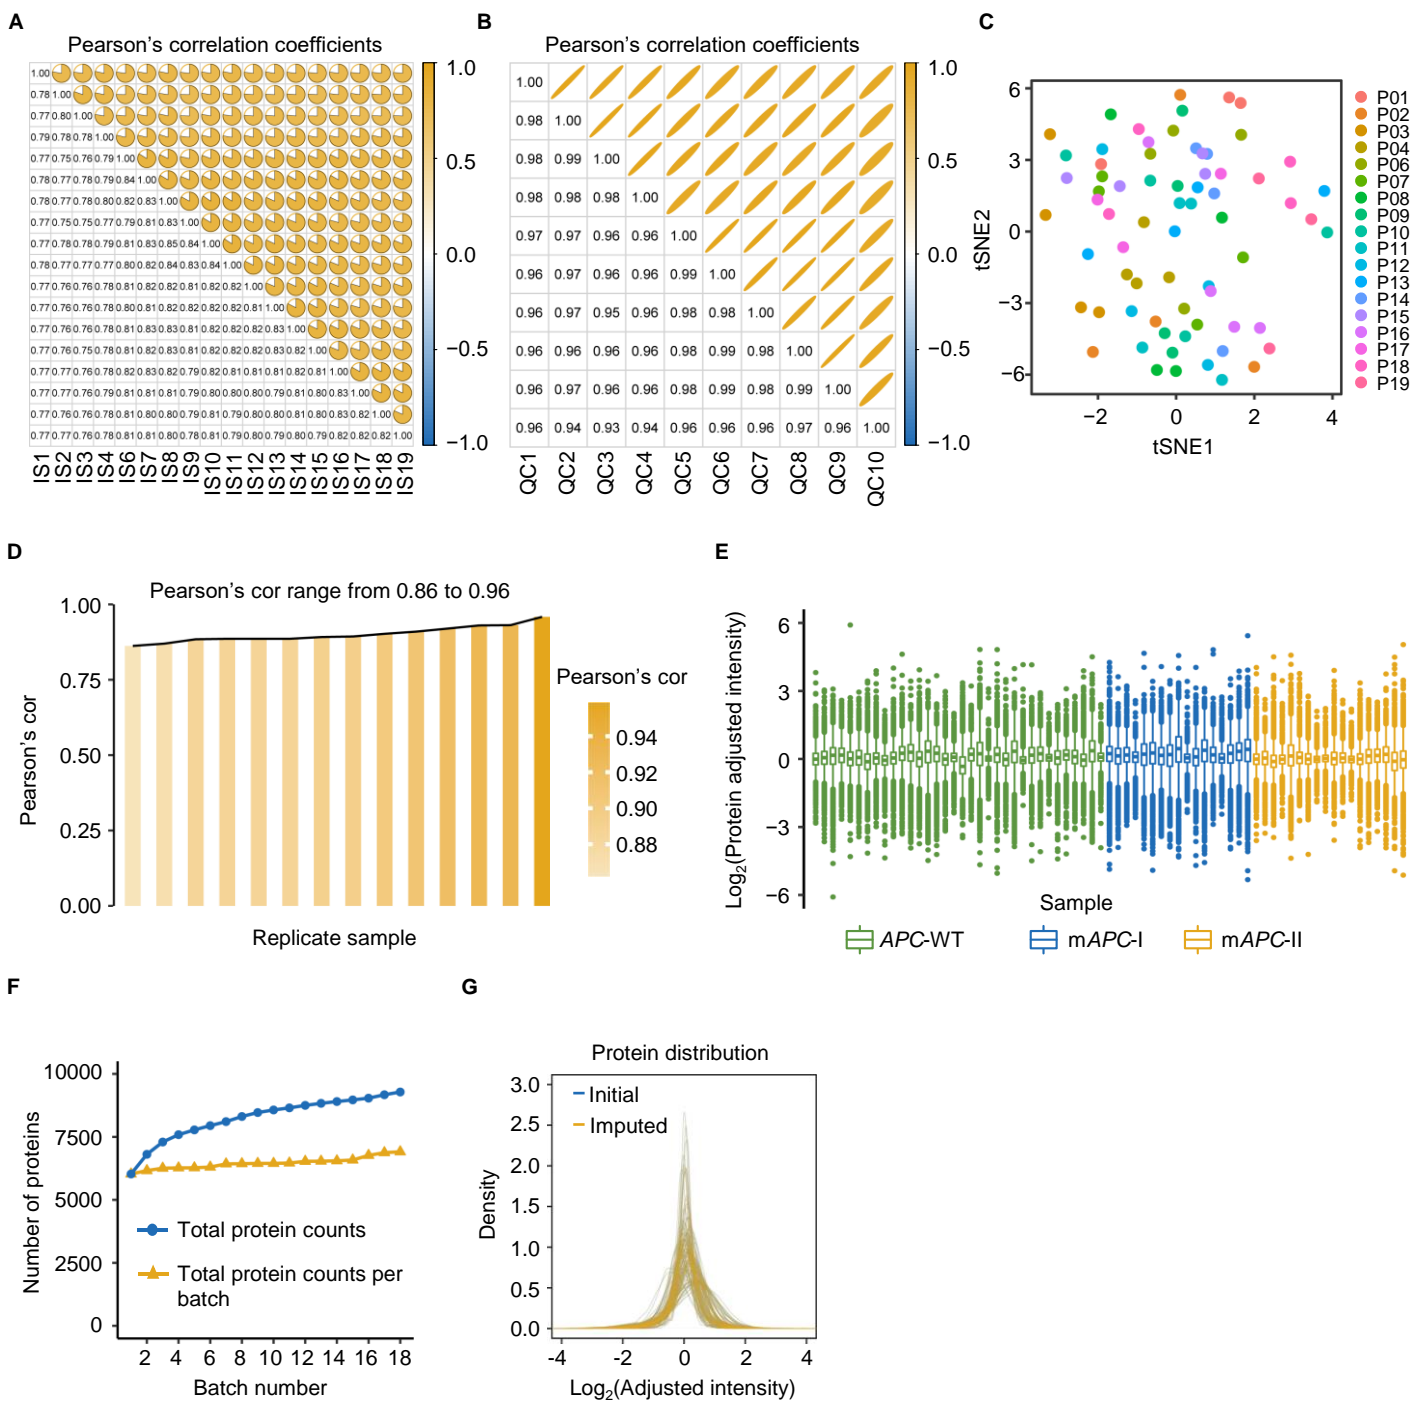

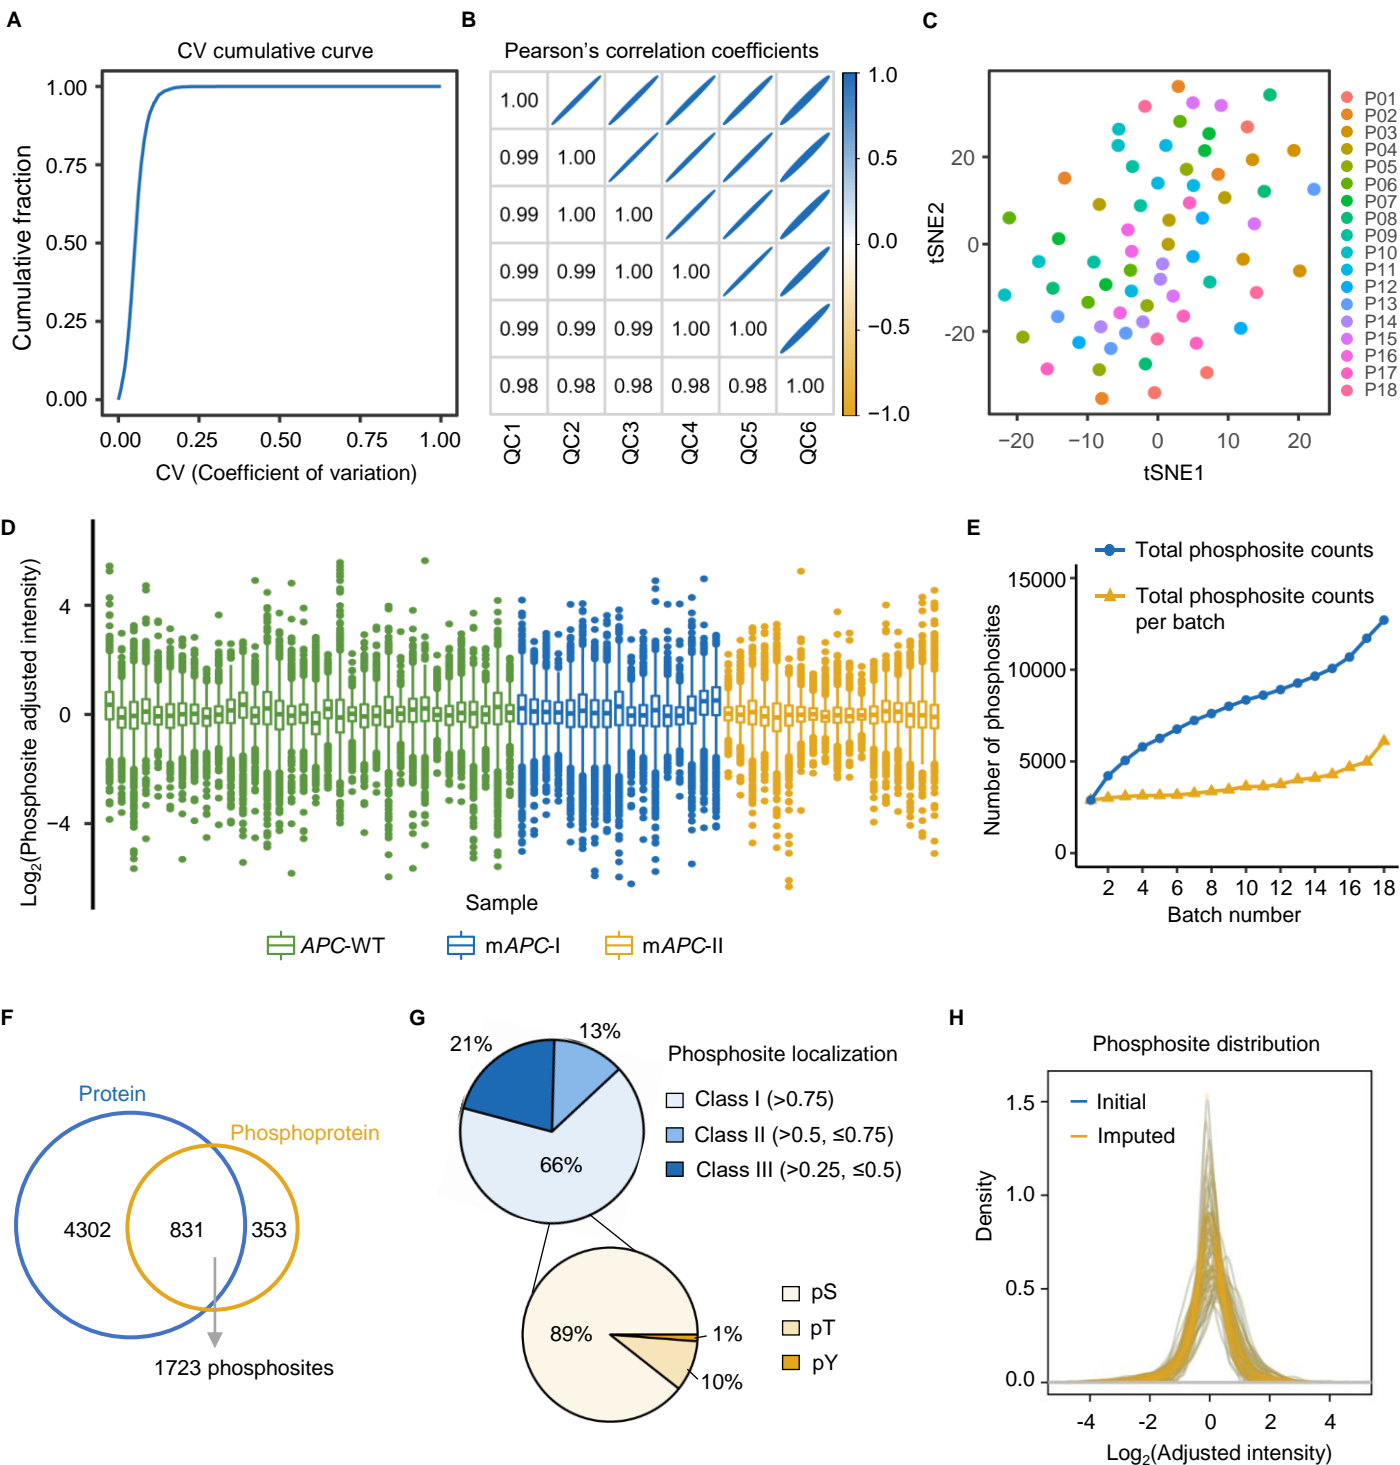

supplemental Fig. S4

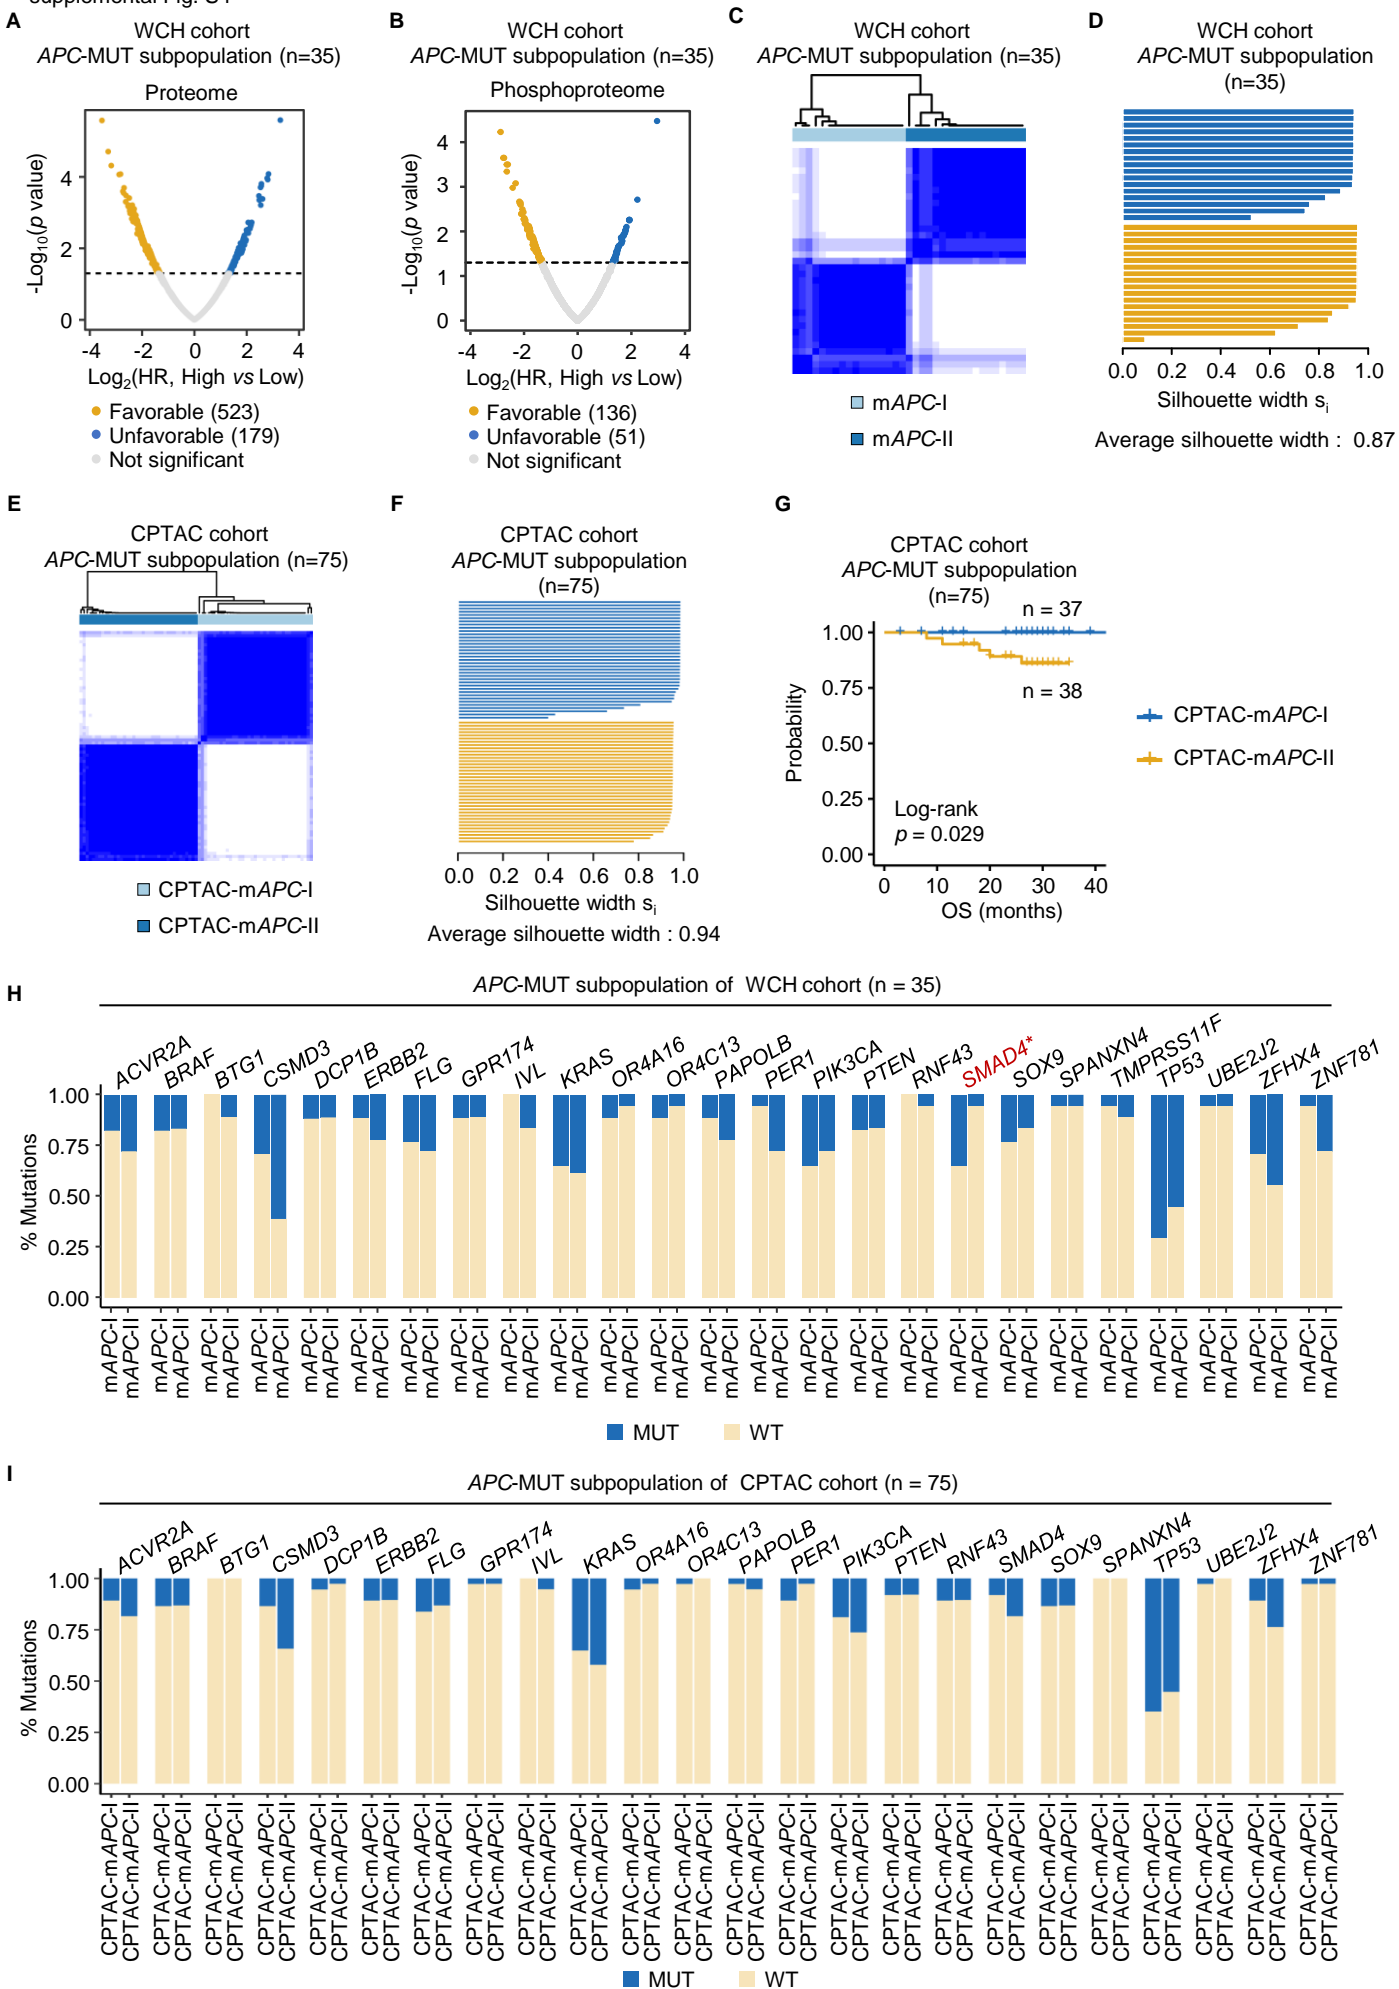

supplemental Fig. S5

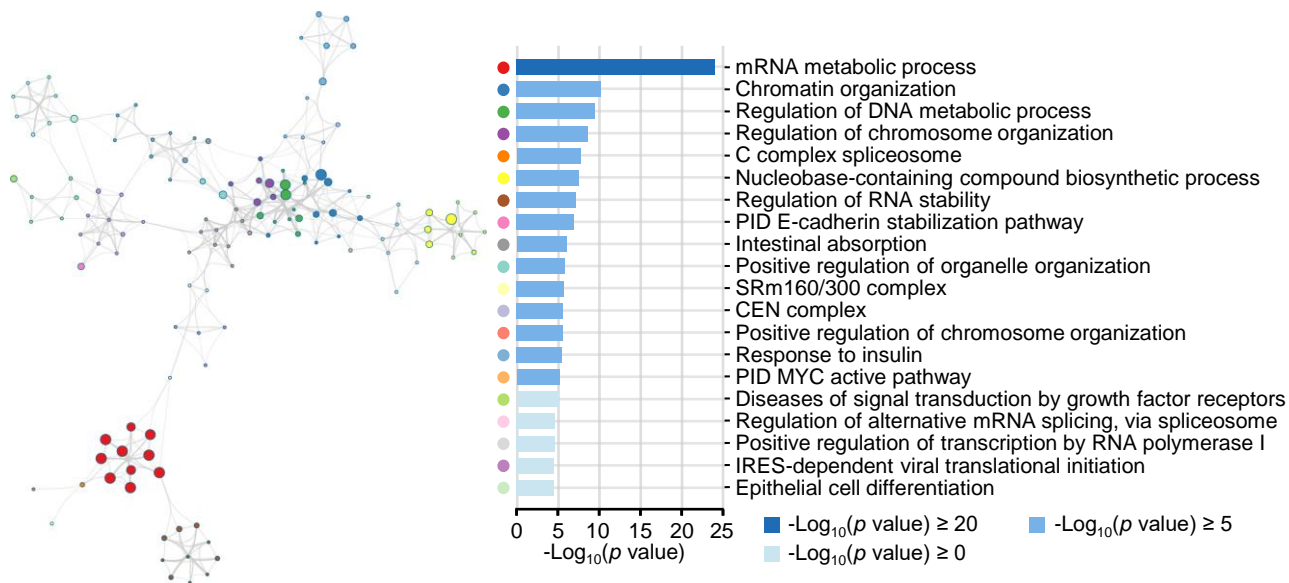

supplemental Fig. S6

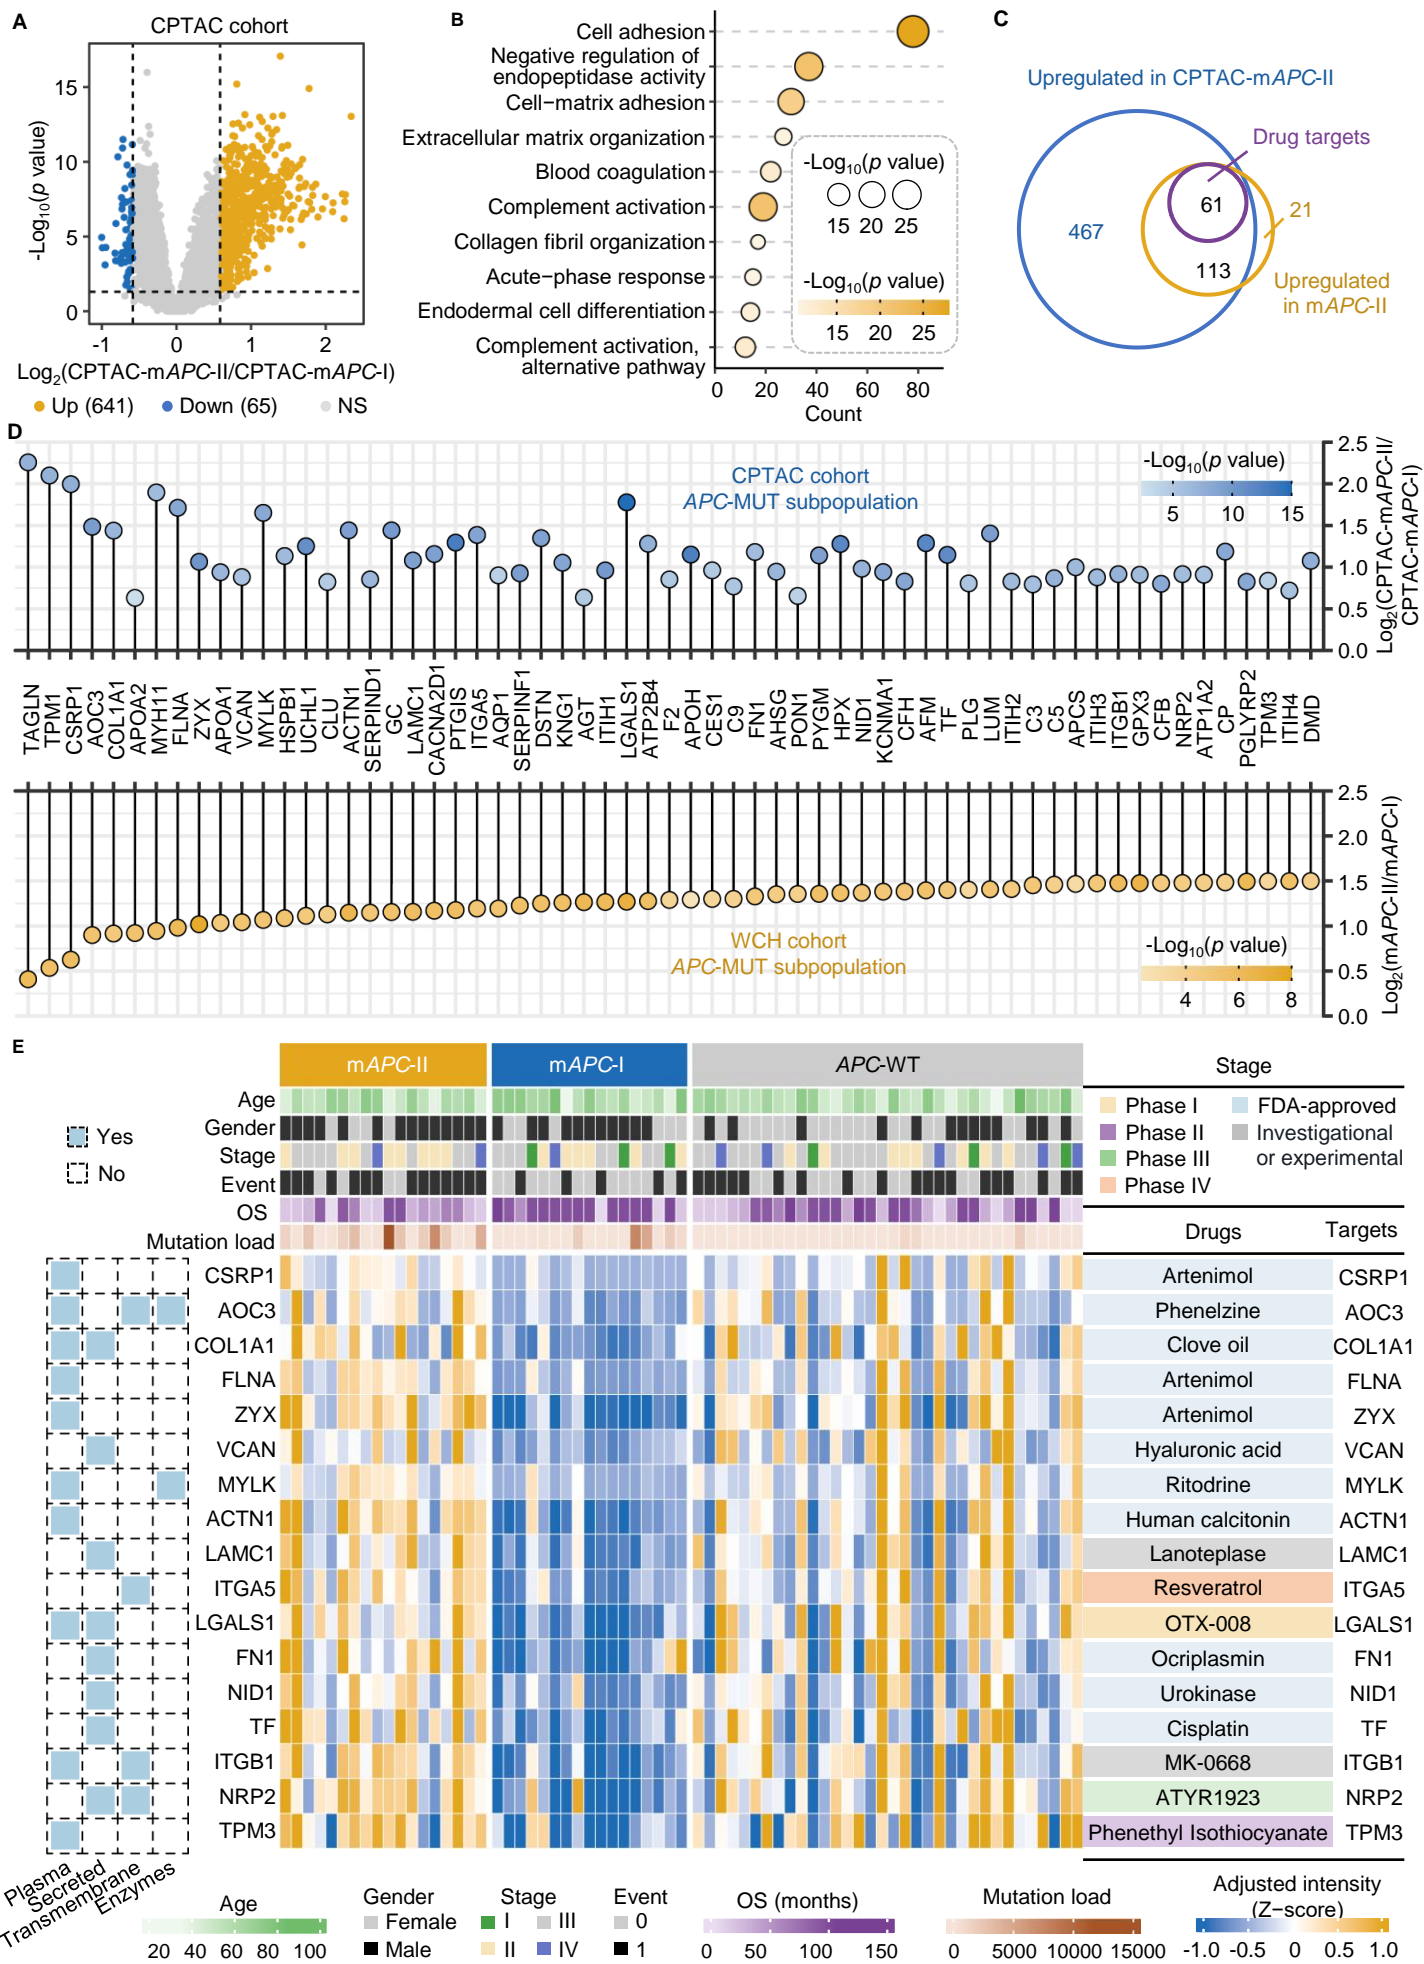

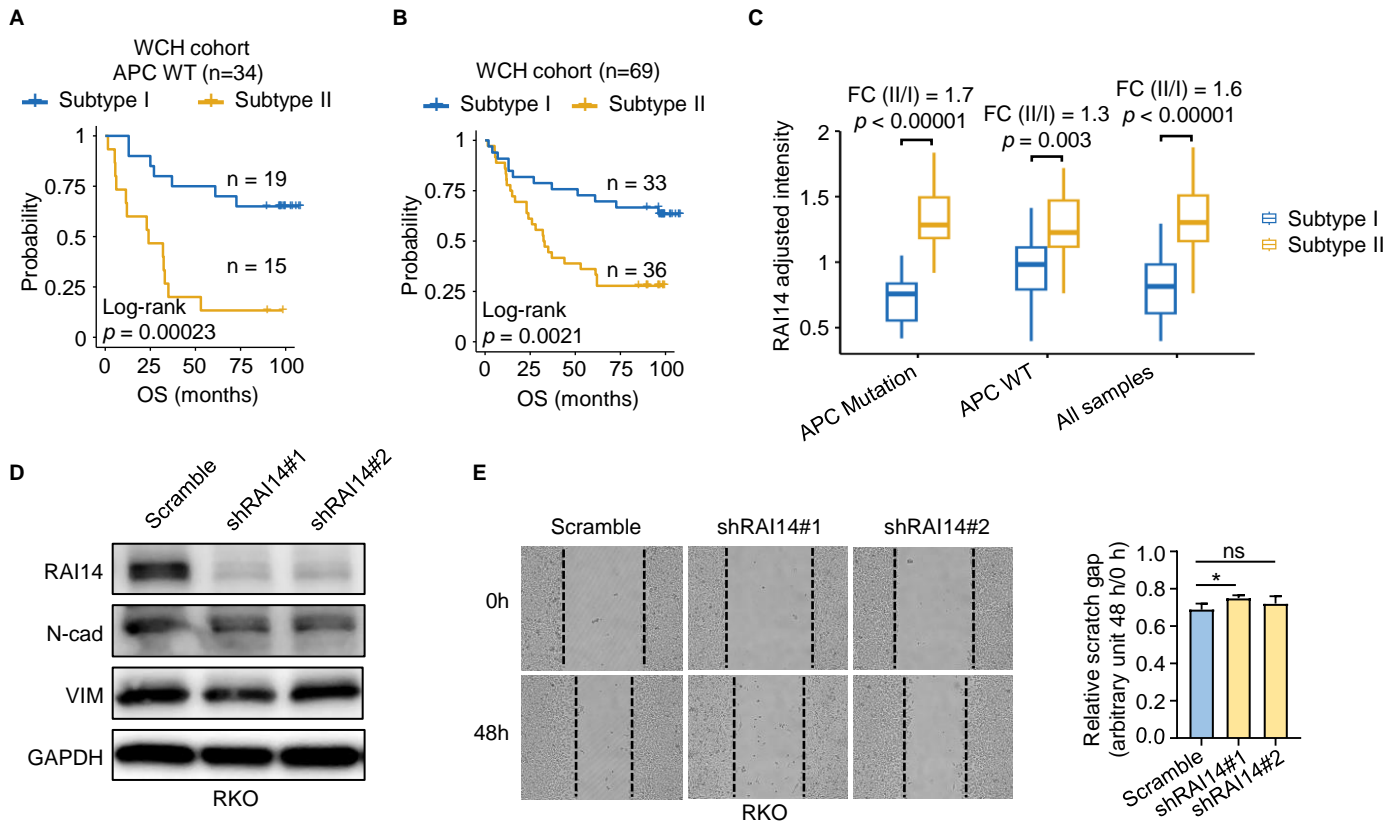

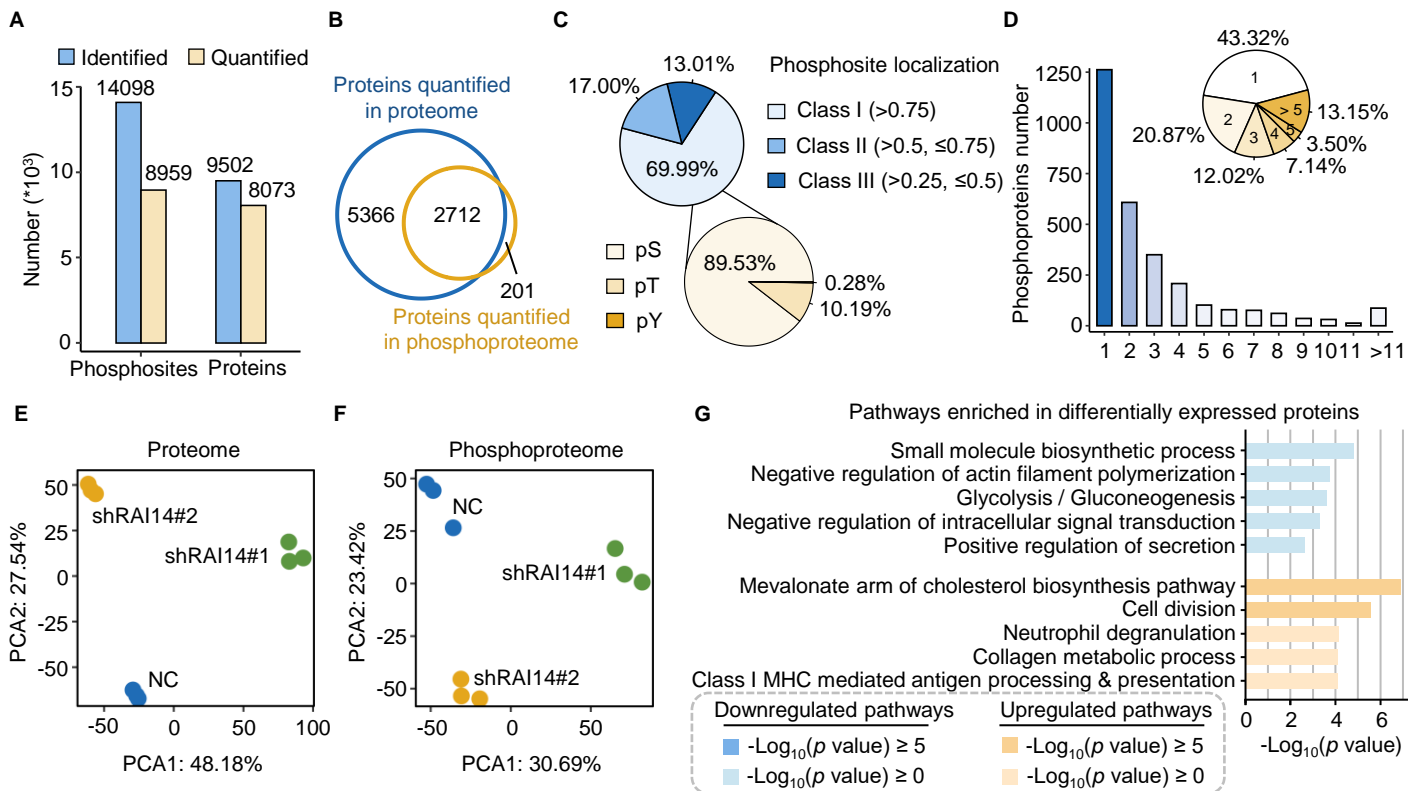



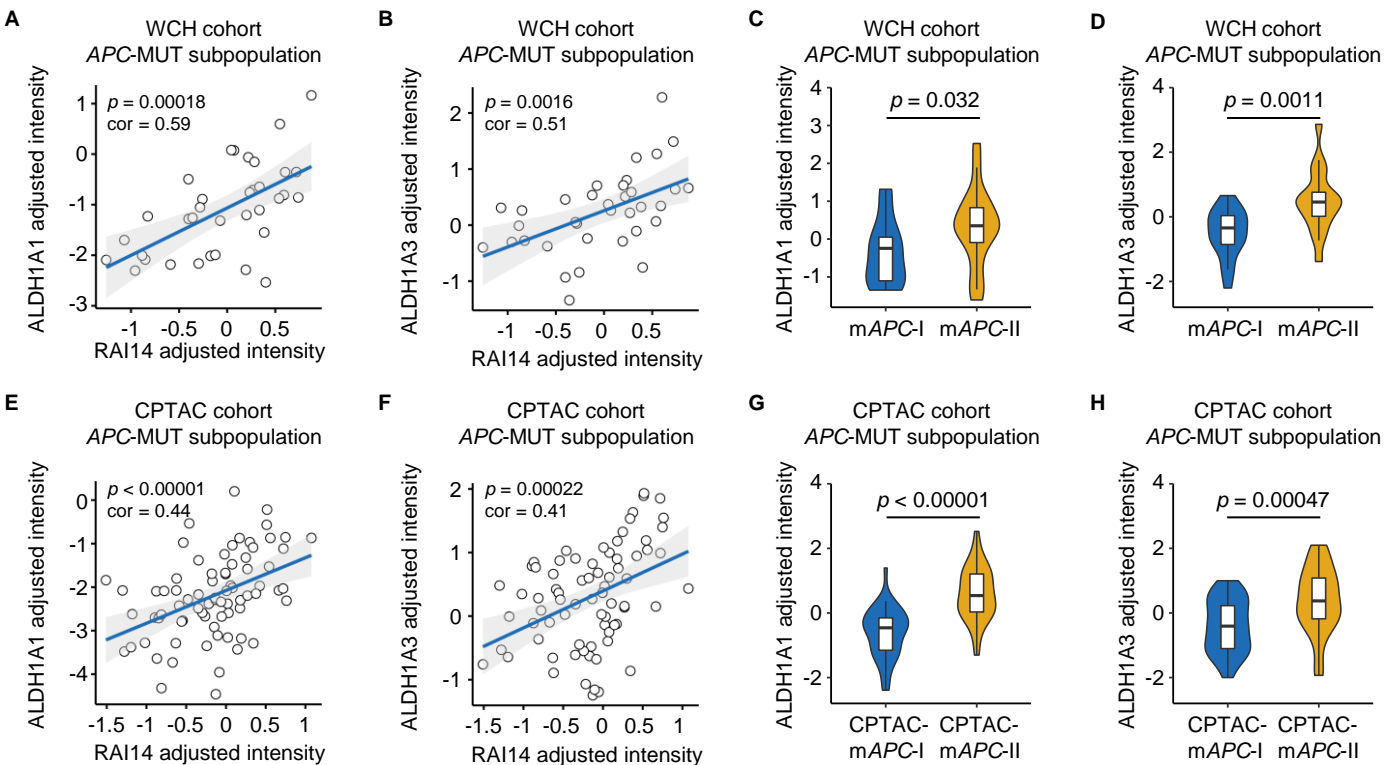

Supplement: mmc9.pdf [file mmc9.pdf]
